# Supplementary material
Source: Springer Nature journal article supplement (https://www.springermedizin.de/resource/supplementary/13058_2011_2870_MOESM1_ESM.pdf/9702772)

**BREAST 1°**

**H&E**

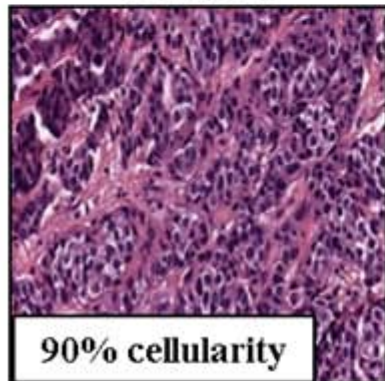

**PTEN**

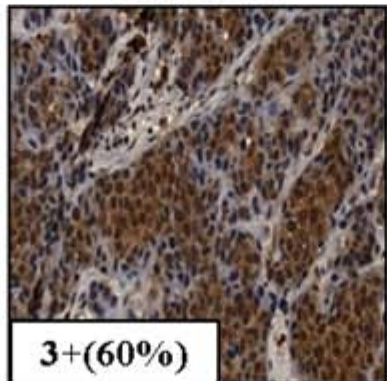

**p-AKT**

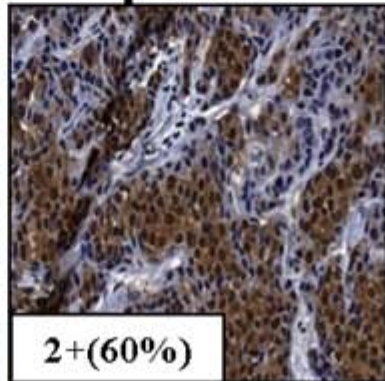

**p-S6K**

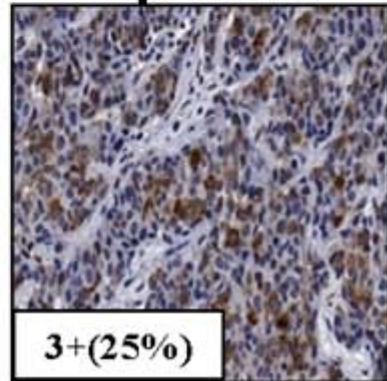

**BRAIN MET**

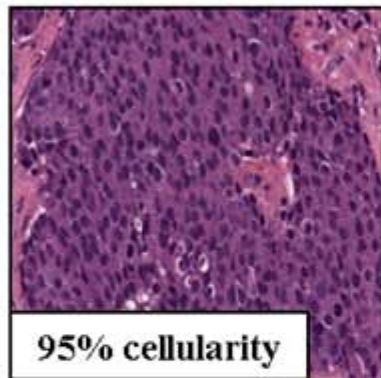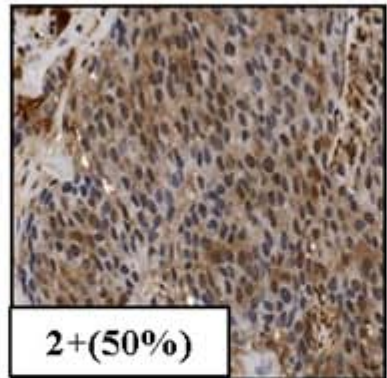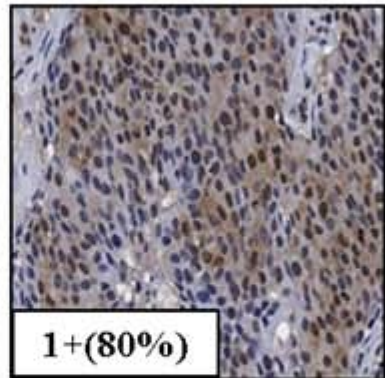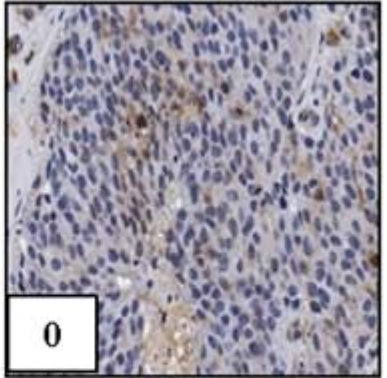

Supplement: MOESM1 [file 9702772]
